# Supplementary material for: RESTORE: Robust intEnSiTy nORmalization mEthod for multiplexed imaging
Source: PubMed Central journal article supplement (PMC7062831; doi:10.1038/s42003-020-0828-1), 2020-03-09
Supplement: 42003_2020_828_MOESM1_ESM.pdf [file 42003_2020_828_MOESM1_ESM.pdf]

## Supplementary Information

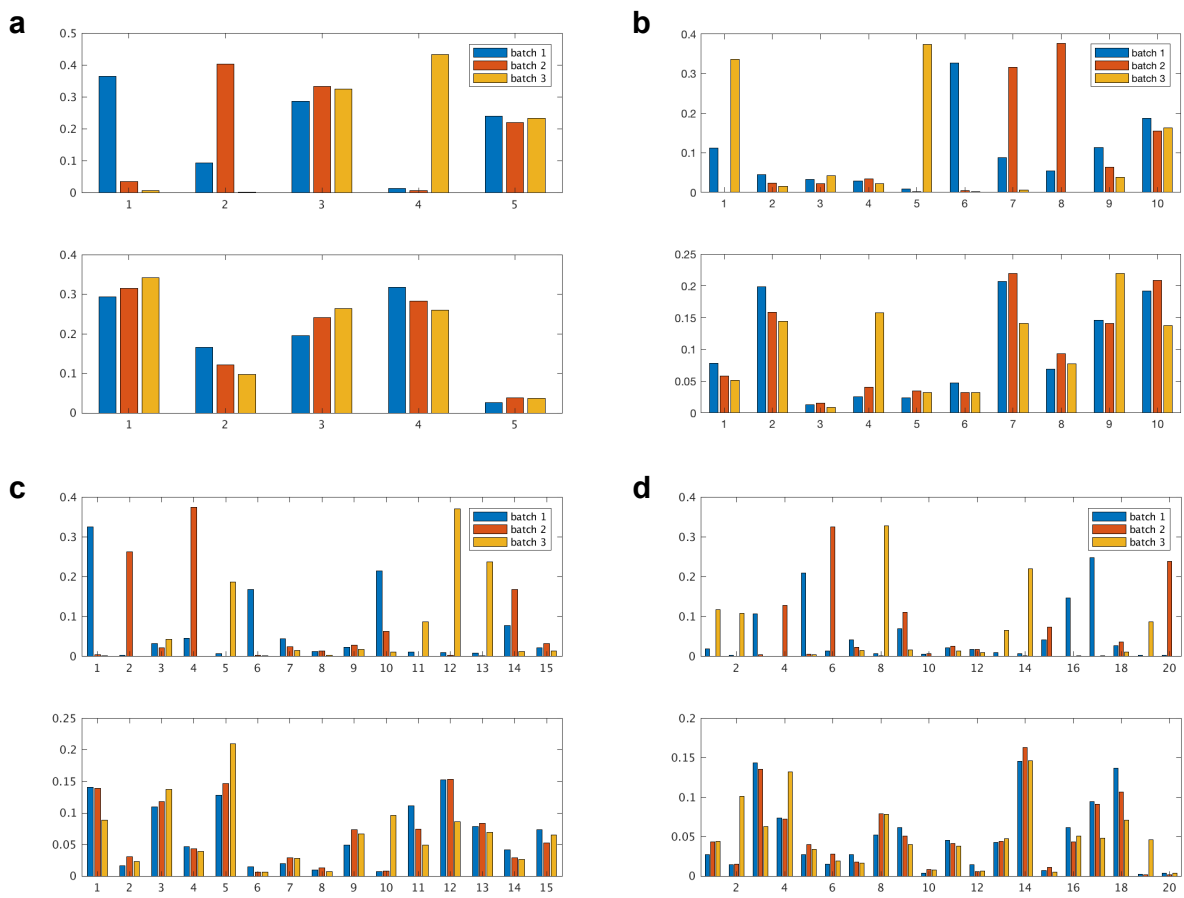

Supplementary Figure 1: Example of cell composition comparison based on unsupervised clustering result between without normalization and with normalization with varying the number of cluster (**a** ( $N = 5$ ), **b** ( $N = 10$ ), **c** ( $N = 15$ ) and **d** ( $N = 20$ )). For each figure, top row shows the result without normalization and bottom row shows the result with normalization where x-axis represents clustered group ID and y-axis represents their cell population. With normalization approaches, each cluster group shows uniform distribution from each batch.

**a**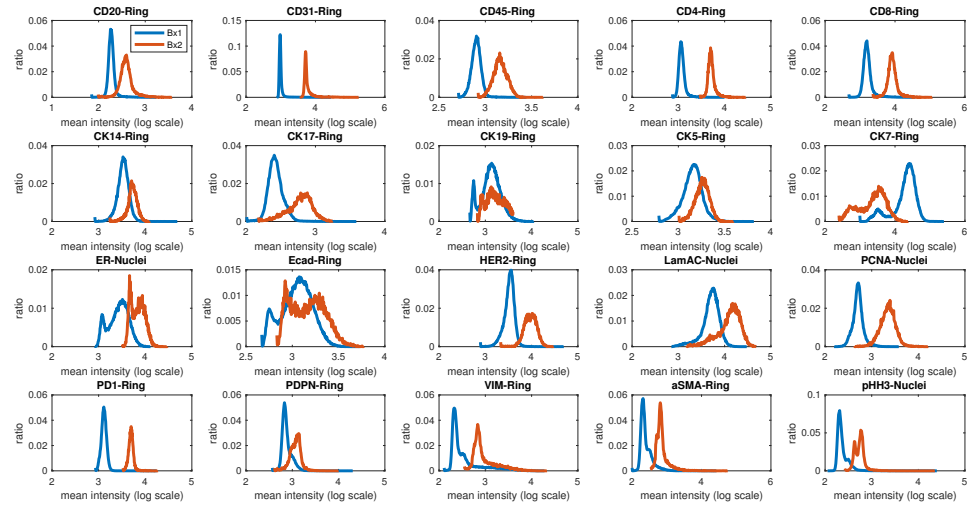**b**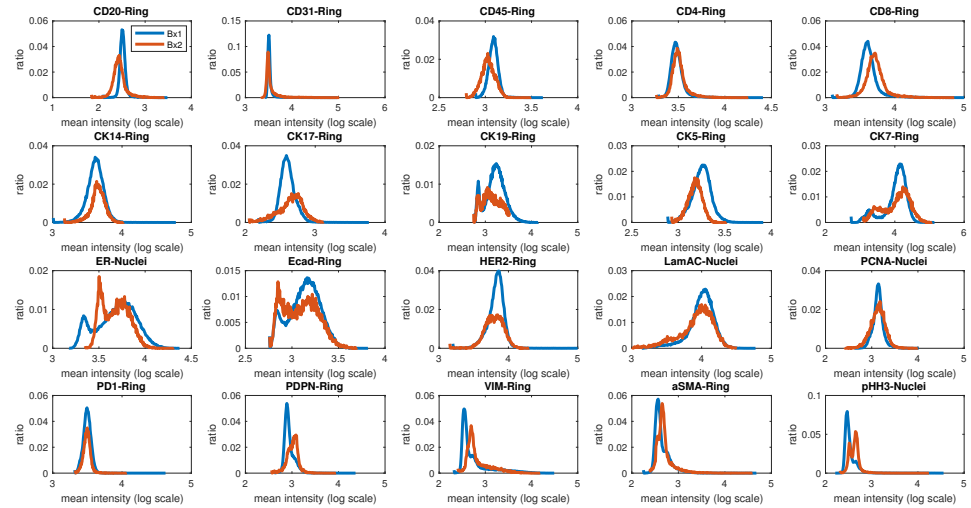

Supplementary Figure 2: CycIF Intensity distribution across Bx 1 (a) and Bx 2 (b) where top figure shows before normalization and bottom figure shows after normalization based on inferred background signal.

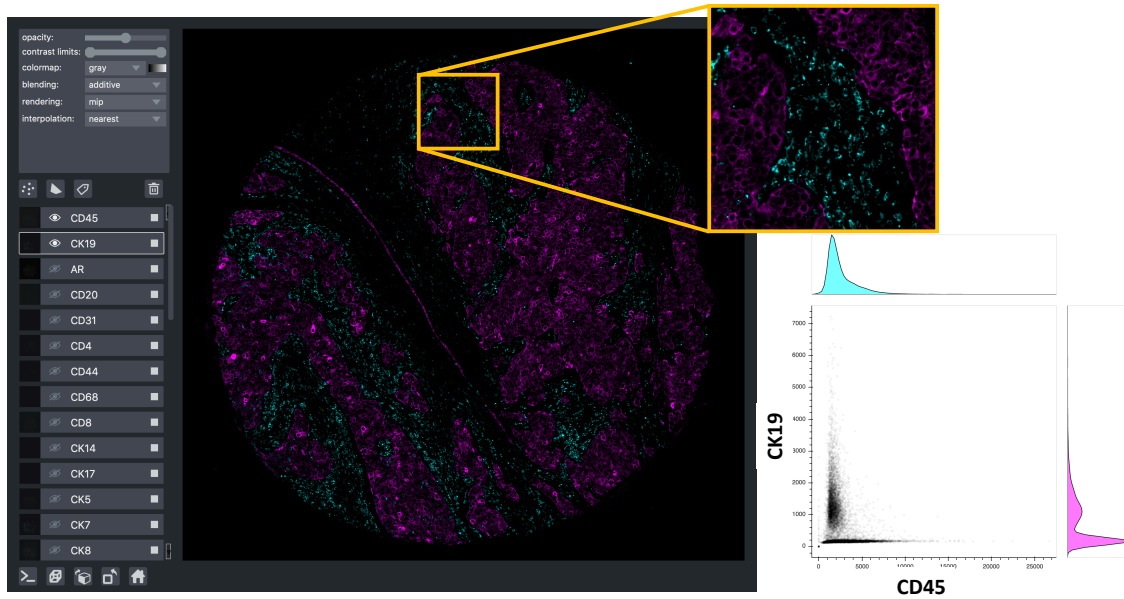

Supplementary Figure 3: A simple multi-dimensional image viewer based on Napari [26] will be useful to validate mutually exclusive biomarker pairs. Here, we visualize immune marker (CD45) and cancer marker (CK19) with scatter plot which shows clear mutual exclusiveness.

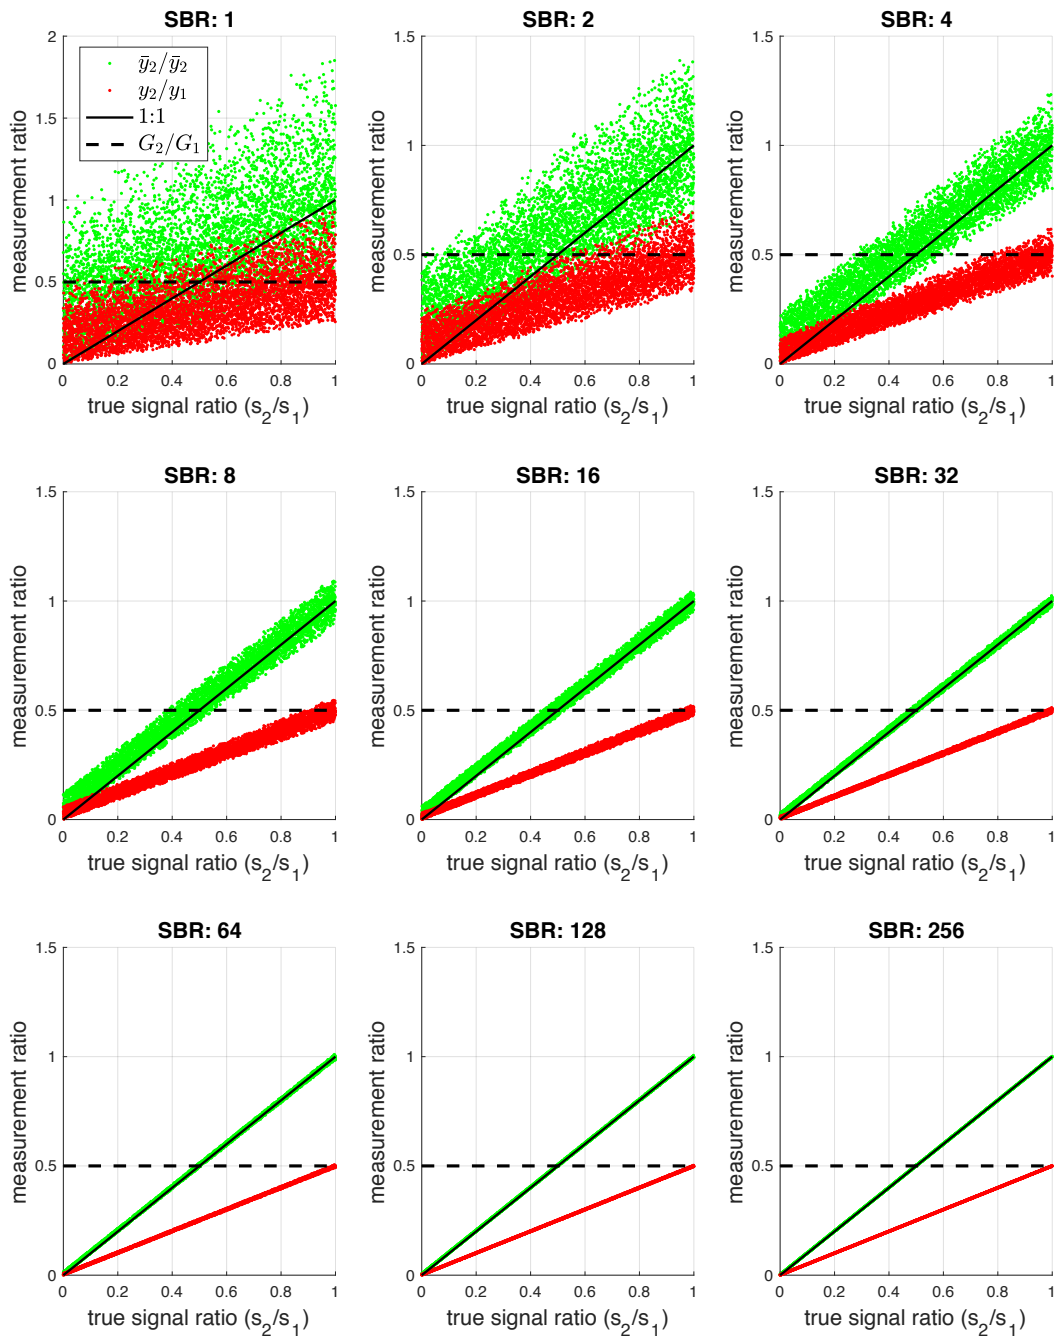

Supplementary Figure 4: Comparison between true signal ratio and measurement signal ratio with and without normalization by changing signal to background ratio (SBR): as SBR increases, the normalized signal ratio is close to the true signal ratio. On the other hand, without normalization, measurement signal ratio is proportional to gain  $G_2/G_1$  (0.5, in this simulation setting).



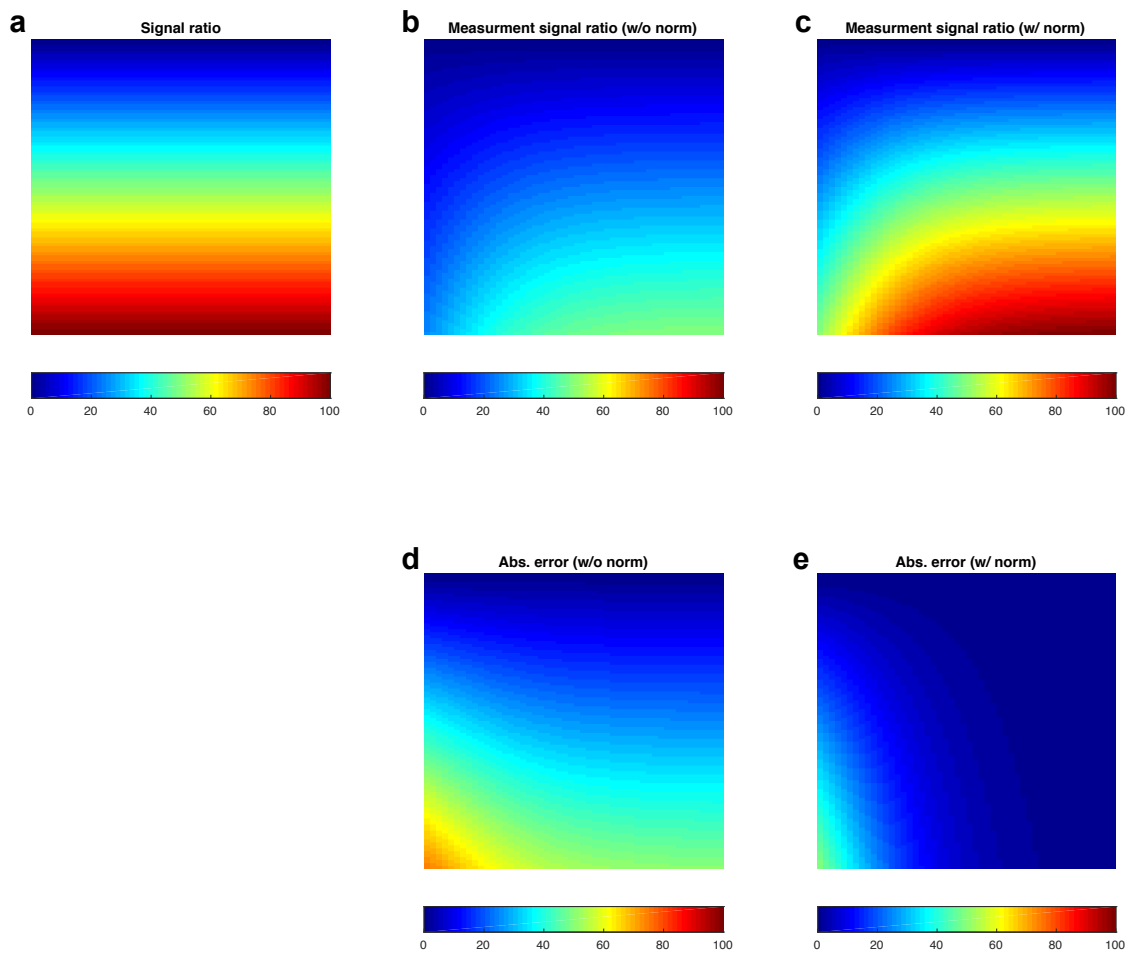

Supplementary Figure 5: A heat map representation: (a) true signal ratio, (b) measurement signal ratio [w/o norm], (c) measure signal ratio [w/ norm], (d) error [w/o norm], (e) error [w/ norm] where color represents signal ratio (low in blue and high in red). From left to right across columns, signal to background ratio (SBR) increases and thus, measurement signal ratio with normalization is close to the true signal ratio.

| Markers | Data-driven approach |      |       |       |       | Knowledge-based approach |      |      |      |      |
|---------|----------------------|------|-------|-------|-------|--------------------------|------|------|------|------|
|         | 1st                  | 2nd  | 3rd   | 4th   | 5th   | 1st                      | 2nd  | 3rd  | 4th  | 5th  |
| AR      | CD31                 | HER2 | CK7   | CD45  | LamB2 | -                        | -    | -    | -    | -    |
| aSMA    | CK19                 | HER2 | CD68  | PgR   | H3K27 | CK19                     | CK7  | CD68 |      |      |
| CD20    | CD31                 | HER2 | CK7   | CD68  | PgR   | CK19                     | CK7  | CK14 | CK5  |      |
| CD3     | CK7                  | HER2 | CD31  | CK19  | CD68  | CK19                     | CK7  | CK14 | CK5  |      |
| CD4     | HER2                 | CK19 | CK7   | CD31  | H3K27 | CK19                     | CK7  | CK14 | CK5  |      |
| CD44    | CK19                 | CD68 | Ecad  | PgR   | HER2  | -                        | -    | -    | -    | -    |
| CD45    | CK7                  | HER2 | CD31  | CK19  | LamB2 | CK19                     | CK7  | CK14 | CK5  |      |
| CD68    | CK19                 | PgR  | CK14  | Ecad  | H3K27 | CK19                     | CK7  | CD31 |      |      |
| CD8     | CK7                  | HER2 | CD31  | CK19  | LamB2 | CK19                     | CK7  | CK14 | CK5  |      |
| CK14    | CD68                 | Ki67 | ColI  | cPARP | GrNZB | CD31                     | CD68 | Vim  |      |      |
| CK17    | CD68                 | CK14 | PgR   | CK19  | CD44  | CD31                     | CD68 | Vim  |      |      |
| CK19    | CD68                 | CD44 | Vim   | CD31  | CD4   | CD68                     | CD4  | CD31 |      |      |
| CK5     | CD68                 | PgR  | CK19  | CD44  | Ecad  | CD31                     | CD68 | Vim  |      |      |
| CK7     | CD31                 | Vim  | CD4   | CD45  | CD3   | CD68                     | CD4  | CD31 |      |      |
| CK8     | CD31                 | CD68 | Vim   | CD4   | HER2  | CD68                     | CD4  | CD31 |      |      |
| ColI    | CK14                 | CD68 | CK19  | PgR   | CK5   | CK19                     | CK7  | CK14 | CK5  |      |
| ColIV   | CD68                 | PgR  | CK19  | HER2  | CD31  | CK19                     | CK7  | CK14 | CK5  | CD68 |
| cPARP   | CK14                 | CD68 | GRNZB | PgR   | Ki67  | -                        | -    | -    | -    | -    |
| Ecad    | CD68                 | CD44 | CK14  | Vim   | PgR   | CD68                     | CD4  | CD31 |      |      |
| ER      | CD31                 | HER2 | CK7   | CD68  | Vim   | CD68                     | CD4  | CD31 |      |      |
| FoxP3   | CD68                 | HER2 | CK19  | PgR   | CD31  | CK19                     | CK7  | CK5  |      |      |
| GRNZB   | CK14                 | Ki67 | cPARP | ColI  | CD68  | CK19                     | CK7  | CK5  | CD31 |      |
| H3K27   | CD68                 | HER2 | CD44  | CD31  | PgR   | -                        | -    | -    | -    | -    |
| H3K4    | CD31                 | CD68 | HER2  | CK19  | PgR   | -                        | -    | -    | -    | -    |
| LamB2   | HER2                 | CD31 | CK7   | CK19  | CD68  | -                        | -    | -    | -    | -    |
| LaminAC | CD68                 | PgR  | CK19  | CD44  | CK14  | -                        | -    | -    | -    | -    |
| PCNA    | CK7                  | CD45 | CD31  | HER2  | CD3   | -                        | -    | -    | -    | -    |
| PD1     | CD68                 | HER2 | CD31  | PgR   | CK19  | CK19                     | CK7  | CK14 | CK5  | CD31 |
| PDPNP   | CD68                 | CK19 | HER2  | PgR   | CK14  | CK19                     | CK7  | CK14 | CK5  | CD68 |
| pERK    | CD68                 | HER2 | CD31  | PgR   | CK14  | -                        | -    | -    | -    | -    |
| PgR     | CD68                 | CK14 | HER2  | CD44  | CK19  | CD68                     | CD4  | CD31 |      |      |
| pHH3    | GRNZB                | CK14 | CD68  | ColI  | Ki67  | -                        | -    | -    | -    | -    |
| pRB     | CK14                 | CD68 | PgR   | CK19  | GRNZB | -                        | -    | -    | -    | -    |
| pS6     | CD68                 | CK14 | PgR   | CK19  | CD44  | -                        | -    | -    | -    | -    |
| Vim     | HER2                 | CK19 | CK7   | Ecad  | H3K27 | CK19                     | CK7  | CD68 |      |      |
| HER2    | CD31                 | Vim  | CD4   | PgR   | CD44  | CD68                     | CD4  | CD31 |      |      |
| Ki67    | CK14                 | CD68 | GRNZB | CD44  | PgR   | -                        | -    | -    | -    | -    |

Supplementary Table 1: A list of mutually exclusive marker pairs based on (left panel) data-driven and (right panel) biologically-known information. Red color on the left panel indicates that matched pairs exist on the right panel. Green color on the right panel indicates that matched pairs exist on the left panel.
